# Supplementary material for: Highly Toughened and Transparent Biobased Epoxy Composites Reinforced with Cellulose Nanofibrils
Source: PubMed Central journal article supplement (PMC6523465; doi:10.3390/polym11040612), 2019-04-03
Supplement: polymers-11-00612-s001.pdf [file polymers-11-00612-s001.pdf]

## Supplementary information

# Highly Toughened and Transparent Biobased Epoxy Composites Reinforced with Cellulose Nanofibrils

Sandeep S. Nair <sup>1</sup>, Christopher Dartiailh <sup>2</sup>, David B. Levin <sup>2</sup>, Ning Yan <sup>1,3 \*</sup>

<sup>1</sup> Faculty of Forestry, University of Toronto, 33 Willcocks Street, Toronto, Ontario M5S 3B3, Canada;

<sup>2</sup> Department of Biosystems Engineering, University of Manitoba, E2-376 Engineering and Information Technology Complex (EITC), 75 Chancellors Circle, Winnipeg, MB R3T 5V6, Canada;

<sup>3</sup> Department of Chemical Engineering and Applied Chemistry, University of Toronto, 200 College Street, Toronto, Ontario M5S 3E5, Canada

\* Correspondence: Tel.: +14169468070. Fax: +14169783834. E-mail: ning.yan@utoronto.ca.

**Table S1.** Water vapour transmission of the epoxy, composite and the CNF film.

| Type of sample    | WVT (g/m <sup>2</sup> day) | Thickness (μm) | WVT *100<br>(Thickness normalized) (g/m <sup>2</sup> day) *m |
|-------------------|----------------------------|----------------|--------------------------------------------------------------|
| CNF film          | 536.73 ± 1.10              | 45 ± 0.66      | 2.42 ± 0.03                                                  |
| Epoxy             | 4.48 ± 0.41                | 600 ± 6.21     | 0.27 ± 0.00                                                  |
| 23 wt % composite | 2.99 ± 0.06                | 327 ± 2.11     | 0.10 ± 0.00                                                  |
